# Supplementary material
Source: HighWire-hosted journal article supplement (https://www.annfammed.org/content/suppl/2018/07/09/16.4.338)
Supplement: Parker_Supp_App_and_Tables.pdf [file Parker_Supp_App_and_Tables.pdf]

**SUPPLEMENTAL MATERIALS FOR**

Parker L, Bero L, Gillies D, et al. Mental health messages in prominent mental health apps. *Ann Fam Med.* 2018;16(4):338-342.

## Supplemental Appendix

### Sample selection process

The app store ‘crawling’ program interacted directly with the iTunes and Google Play app stores’ application programming interface and extracted meta-data on the top 100 apps in the Health and Fitness and Medical store categories in the US, UK, Canada, and Australia.

We ran this program weekly and included apps that were present in the top 100 for at least two of the four sampled weeks in any country or any store.

We additionally sampled any mental health app that was endorsed in selected mainstream media (*The New York Times*, *BBC* and *The Guardian*), digital health blogs (*MobiHealth news* and *RockHealth weekly*, both US based, covering the international app market from an industry perspective) or social media (Twitter), or prominent Australian government, public health or mental health organisation websites.

**Table A1. Content analysis data collection form**

|                                                                                                                                                                                                                                                                                                                                                                                        |
|----------------------------------------------------------------------------------------------------------------------------------------------------------------------------------------------------------------------------------------------------------------------------------------------------------------------------------------------------------------------------------------|
| <p><b>App name(s):</b></p> <p><b>Developer name(s):</b></p> <p><b>Materials for analysis:</b></p> <p><i>Store description:</i></p> <p><i>Developer website:</i></p> <p><b>1. In a sentence, summarize the key focus (i.e. condition, health or life problem) of the app and the key strategies used to address it. e.g. To promote mental health using mindfulness meditation.</b></p> |
|----------------------------------------------------------------------------------------------------------------------------------------------------------------------------------------------------------------------------------------------------------------------------------------------------------------------------------------------------------------------------------------|

**2. What are the app’s key claims?** *What are the key promotional messages in the app store description or linked website designed to attract consumers? What are the key mental health claims?*

**3. What are the app’s key messages about mental health?** *How are mental health conditions referred to? Nature of diagnostic categories? Definitions of mental illness or symptoms? Who is responsible for the user’s mental health? Determinants of mental health or illness?*

**4. Does the app make any scientific claims?** Yes / No

**4.1 If yes, what are they and what effect do they have?** *Describe the scientific claims and copy and paste relevant quotations (e.g. “a science-based approach,” “proven to,” “developed with clinicians”); What is there effect on the app’s credibility?*

**4.2 If yes, how are they backed up?** *(e.g. citations, name dropping research institutions, research partnerships, use of DSM); copy and paste relevant “evidence” and describe it’s effect*

**5. Does the app make any kind of disclaimer?** Yes / No

**5.1 If yes, please copy and paste and describe it’s impact.** *E.g. “Please do not take any action based on the content of this app”*

**6. Does the app project a particular kind of user? If so, what is this person like?** *Take note of gendered or raced messages or images; accessibility accommodations; age groups; sexuality references etc.*

**Table A2. List of included mental health apps**

| App name (Google Play) | App name (iTunes)                     | Developer name (Google Play) | Developer name (iTunes) | Source  |
|------------------------|---------------------------------------|------------------------------|-------------------------|---------|
| ACT Companion          | ACT Companion: The Happiness Trap App | Berrick Psychology           | Berrick Psychology      | Top 100 |

|                                   |                                                             |                                          |                                                            |                        |
|-----------------------------------|-------------------------------------------------------------|------------------------------------------|------------------------------------------------------------|------------------------|
| Not available                     | Anorexia<br>Bulimia Binge<br>Eating Test By<br>PocketShrink | Not available                            | PocketShrink                                               | Top 100                |
| Anxiety Release<br>based on EMDR  | Anxiety Release<br>based on EMDR                            | Mark Grant                               | trauma and pain<br>management<br>services pty ltd          | Top 100                |
| Anxiety Test                      | Anxiety<br>Screening Test                                   | MoodTools                                | Eddie Liu                                                  | Top 100                |
| At Ease Anxiety<br>& Worry Relief | At Ease: Anxiety<br>& Worry Relief                          | Meditation Oasis                         | Meditation Oasis                                           | Top 100                |
| Not available                     | Beat Panic                                                  | Not available                            | Jane Anderson-<br>Hawkes                                   | ReachOut<br>toolbox    |
| Beat Social<br>Phobia             | Beat Social<br>Phobia with<br>Andrew Johnson                | HiveBrain<br>Software                    | Michael<br>Schneider                                       | Top 100                |
| BeyondNow<br>suicide safety plan  | BeyondNow<br>suicide safety<br>plan                         | beyondblue                               | beyondblue                                                 | Top 100;<br>beyondblue |
| Black Dog<br>Snapshot             | Black Dog<br>Snapshot                                       | Black Dog Institute                      | Black Dog<br>Institute                                     | Black Dog<br>Institute |
| Breathe2Relax                     | Breathe2Relax                                               | T2                                       | The National<br>Center for<br>Telehealth and<br>Technology | ReachOut<br>toolbox    |
| Breathing Zone                    | Breathing Zone:<br>Guided Breathing<br>for Mindfulness      | Breathing Zone                           | Breathing Zone                                             | Top 100                |
| Bust PTSD                         | Bust PTSD                                                   | CCEI<br>Psychotherapy &<br>Research Inc. | CCEI<br>Psychotherapy &<br>Research Inc.                   | Top 100                |

|                                |                                                                                                               |                  |                    |                  |
|--------------------------------|---------------------------------------------------------------------------------------------------------------|------------------|--------------------|------------------|
| Calm Down Now: Panic & Anxiety | Calm Down Now                                                                                                 | June Tomaso-Wood | Calm Down Now LLC  | Top 100          |
| Calm - Meditate, Sleep, Relax  | Calm: Meditate & relax with guided mindfulness meditation for stress reduction                                | Calm.com, Inc.   | Calm.com           | Top 100          |
| Cognitive Diary CBT Self-Help  | Not available                                                                                                 | Excel At Life    | Not available      | Top 100          |
| Not available                  | DBT Diary Card and Skills Coach                                                                               | Not available    | Durham DBT, Inc.   | Top 100          |
| Depression CBT Self-Help Guide | Not available                                                                                                 | Excel At Life    | Not available      | Top 100          |
| Anxiety Relief Hypnosis Free   | End Anxiety Hypnosis - Guided Meditation for Relaxation, Relief of Chronic Stress & Panic Attack Symptoms     | Surf City Apps   | Surf City Apps LLC | Top 100          |
| Anxiety Relief Hypnosis Pro    | End Anxiety Hypnosis PRO - Guided Meditation for Relaxation, Relief of Chronic Stress & Panic Attack Symptoms | Surf City Apps   | Surf City Apps LLC | Top 100          |
| Happify                        | Happify -- Activities &                                                                                       | Happify, Inc.    | Happify, Inc.      | ReachOut toolbox |

|                                  |                                                                                                      |                                                   |                                                        |                       |
|----------------------------------|------------------------------------------------------------------------------------------------------|---------------------------------------------------|--------------------------------------------------------|-----------------------|
|                                  | Games for Stress & Anxiety                                                                           |                                                   |                                                        |                       |
| Headspace - meditation           | Headspace: Guided meditation and mindfulness techniques                                              | Headspace, Inc.                                   | Headspace meditation limited                           | Top 100               |
| High Res                         | High Res                                                                                             | Australian Government, Dept. of Veterans' Affairs | Australian Government, Department of Veterans' Affairs | Department of Defence |
| Not available                    | In Hand - A tool to focus where you're at and bring back the balance.                                | Not available                                     | Red Ninja Limited                                      | ReachOut toolbox      |
| Meditation Studio by Gaiam, Inc. | Meditation Studio - Guided meditations for relaxation, less stress, better sleep, and a healthy mind | Gaiam, Inc.                                       | Meditation Studio LLC                                  | Top 100               |
| Mindfit                          | Mindfit                                                                                              | Mindfit                                           | Mindfit AS                                             | Top 100               |
| Not available                    | Mindfulness Daily                                                                                    | Not available                                     | inward inc                                             | Top 100               |
| Mindfulness: Brain-based         | Mindfulness Meditation: Brain-based                                                                  | MyBrainSolutions                                  | BRC International Pty Ltd                              | Top 100               |
| Mindfulness: The Art of Being    | Mindfulness: The Art of Being Human                                                                  | Mindful Creation                                  | Lowe, Reuben                                           | Top 100               |

|                             |                                                                            |                                                   |                                                        |                               |
|-----------------------------|----------------------------------------------------------------------------|---------------------------------------------------|--------------------------------------------------------|-------------------------------|
| Mindgauge                   | Mindgauge                                                                  | Positive Computing Lab, University of Sydney      | The University of Sydney                               | University of Sydney          |
| MindShift                   | MindShift                                                                  | Anxiety Disorders Association of British Columbia | Anxiety Disorders Association of British Columbia      | Top 100; ReachOut toolbox     |
| Not available               | MoodKit - Mood Improvement Tools                                           | Not available                                     | Thriveport, LLC                                        | ReachOut toolbox              |
| Not available               | Moodnotes - Thought Journal / Mood Diary                                   | Not available                                     | Thriveport, LLC                                        | Top 100                       |
| MoodTools - Depression Aid  | MoodTools - Depression Aid                                                 | MoodTools                                         | Eddie Liu                                              | Top 100                       |
| OMG. I Can Meditate!        | OMG. I Can Meditate! - Meditation and Mindfulness                          | OMG. I Can Meditate!                              | OMG. I Can Meditate! Inc.                              | Top 100                       |
| Operation Life              | Operation Life                                                             | Australian Government, Dept. of Veterans' Affairs | Australian Government, Department of Veterans' Affairs | Department of Defence         |
| Not available               | Optimism                                                                   | Not available                                     | Optimism Apps Pty Ltd                                  | ReachOut toolbox              |
| Pacifica - Stress & Anxiety | Pacifica - Anxiety, Stress, & Depression relief based on CBT & Mindfulness | Pacifica Labs Inc.                                | Pacifica Labs Inc.                                     | Top 100; University of Sydney |

|                                |                                                                                                    |                                                          |                                                   |                       |
|--------------------------------|----------------------------------------------------------------------------------------------------|----------------------------------------------------------|---------------------------------------------------|-----------------------|
| Panic Attack Aid               | Panic Attack Aid                                                                                   | MVM                                                      | Michael Madew                                     | Top 100               |
| Panic Attack Aid Lite          | Panic Attack Aid Lite                                                                              | MVM                                                      | Michael Madew                                     | ReachOut toolbox      |
| Panic Relief- stop anxiety now | Panic Relief                                                                                       | Psychiatrist, MD<br>PhD Marianne<br>Geoffroy,<br>Denmark | Geoffroy Aps                                      | Top 100               |
| Positivity with Andrew Johnson | Positivity with Andrew Johnson                                                                     | HiveBrain Software                                       | Michael Schneider                                 | Top 100               |
| PTSD Coach Australia           | PTSD Coach Australia                                                                               | Australian Government, Dept. of Veterans' Affairs        | Australian Government, Dept. of Veterans' Affairs | Department of Defence |
| Qi Gong Meditation Relaxation  | Not available                                                                                      | Excel At Life                                            | Not available                                     | Top 100               |
| Not available                  | ReachOut Breathe                                                                                   | Not available                                            | ReachOut Australia                                | ReachOut toolbox      |
| ReachOut WorryTime             | ReachOut WorryTime                                                                                 | ReachOut Australia                                       | ReachOut Australia                                | ReachOut toolbox      |
| Relax with Andrew Johnson      | Relax with Andrew Johnson                                                                          | HiveBrain Software                                       | Michael Schneider                                 | Top 100               |
| Relieve Depression Hypnosis    | Relieve Depression Hypnosis - Mental Health Program for Treatment of Depression & Anxiety Symptoms | Surf City Apps                                           | Surf City Apps LLC                                | Top 100               |



|                                |                                                                                                                     |                                   |                                   |                           |
|--------------------------------|---------------------------------------------------------------------------------------------------------------------|-----------------------------------|-----------------------------------|---------------------------|
| Rise Up: Eating Disorder Help  | Rise Up + Recover: An Eating Disorder Monitoring and Management Tool for Anorexia, Bulimia, Binge Eating, and EDNOS | Recovery Warriors                 | Recovery Warriors L.L.C.          | ReachOut toolbox          |
| RR Eating Disorder Management  | Recovery Record - Eating Disorder Management                                                                        | Recovery Record                   | Recovery Record, Inc              | ReachOut toolbox          |
| Self-help Anxiety Management   | Self-help Anxiety Management                                                                                        | University of the West of England | University of the West of England | ReachOut toolbox          |
| Smiling Mind                   | Smiling Mind                                                                                                        | Smiling Mind                      | Smiling Mind Pty. Ltd.            | Top 100; ReachOut toolbox |
| Stop Fears! Hypnosis           | Stop Fears! Overcome Fear and Anxiety by Hypnosis                                                                   | Kim Fleckenstein                  | Kim Fleckenstein                  | Top 100                   |
| Stop Panic & Anxiety Self-Help | Not available                                                                                                       | Excel At Life                     | Not available                     | Top 100; ReachOut toolbox |
| Stop Breathe & Think: Meditate | Stop, Breathe & Think: Meditation and Mindfulness                                                                   | Tools for Peace                   | Stop, Breathe & Think, PBC        | Top 100; ReachOut toolbox |
| SuperBetter                    | SuperBetter                                                                                                         | SuperBetter, LLC                  | SuperBetter, LLC                  | ReachOut toolbox          |
| The Mindfulness App            | The Mindfulness App: Guided & Silent                                                                                | MindApps                          | MindApps                          | Top 100                   |

|                              |                              |                     |                     |                  |
|------------------------------|------------------------------|---------------------|---------------------|------------------|
|                              | Meditations to Relax         |                     |                     |                  |
| Think Anxiety-free! Hypnosis | Not available                | Kim Fleckenstein    | Not available       | Top 100          |
| WellMind                     | WellMind                     | Blue Step Solutions | Blue Step Solutions | ReachOut toolbox |
| What's Up?                   | What's Up?                   | Jackson Tempra      | Jackson Tempra      | ReachOut toolbox |
| Worry Box– Anxiety Self-Help | Not available                | Excel At Life       | Not available       | Top 100          |
| Youthbeyondblue The Check-in | Youthbeyondblue The Check-in | beyondblue          | Beyond Blue Limited | beyondblue       |
